# Supplementary material for: SP1-Induced Upregulation of LncRNA AFAP1-AS1 Promotes Tumor Progression in Triple-Negative Breast Cancer by Regulating mTOR Pathway
Source: MDPI journal article supplement (doi:10.3390/ijms241713401), 2023-08-29
Supplement: s1 [file s1]

**Table S1. Primers or sequences used in the study.**

|                                |                                                                            |
|--------------------------------|----------------------------------------------------------------------------|
| <b><i>siRNAs</i></b>           |                                                                            |
| si-SP1                         | GUGCAAACCAACAGAUUAUTT<br>AUAACUCUGUUGGUUUGCACTT                            |
| si-YY1                         | CAUGCUAAGGCCAAAAACATT<br>UGUUUUUGGCCUUAGCAUGTT                             |
| <b><i>Q-RT-PCR primers</i></b> |                                                                            |
| lncRNA-AFAP1-AS1               | FW: 5'-AATGGTGGTAGGAGGGAGGA-3'<br>RV: 5'-CACACAGGGGAATGAAGAGG-3'           |
| GAPDH                          | FW: 5'-ATGACATCAAGAAGGTGGTGAAGCAGG-3'<br>RV: 5'-GCGTCAAAGGTGGAGGAGTGGGT-3' |
| YY1                            | FW: 5'-TGGCAGAATTTGCTAGAATGAAGC-3'<br>RV: 5'-TGGCCGAGTTATCCCTGAAC-3'       |
| SP1                            | FW: 5'-TTGCTGCTATGCCAAACCTA-3'<br>RV: 5'-CCTGAGAGCTGGGAGTCAAG-3'           |
| EIF4B                          | FW: 5'-CTTCCCAAATCGCCACCC-3'<br>RV: 5'-CGAGCCCTCCAGTCTGTATCT-3'            |
| MAPKAP1                        | FW: 5'-AACAGTTCAAGGGCAGACGG-3'<br>RV: 5'-CAGCAAGGTCACAGGCACA-3'            |
| SGK1                           | FW: 5'-ACCATCTCCAGAGGGAACGC-3'<br>RV: 5'-GCAGGCCATACAGCATCTCATA-3'         |
| SEH1L                          | FW: 5'-TCAGCAGGGAACCTCAAATC-3'<br>RV: 5'-GGCATAACTGGACCATCTCG-3'           |
| SKP2                           | FW: 5'-GCTCAACTACCTCCAACACCT-3'<br>RV: 5'-TCTGGCACGATTCCAAAA-3'            |
| NEDD4L                         | FW: 5'-CGACCCTATACATTAAAGGACTTTC-3'<br>RV: 5'-TGGTGCTGAGAAGCCGAGT-3'       |
| <b><i>CHIP primers</i></b>     |                                                                            |
| P1 primer for ChIP             | 5'-GAGACAGCGTCCATTCACTCCC-3'<br>5'-ACAAAGATTTCTCCTAACCTTCC-3'              |
| P2 primer for ChIP             | 5'-GACCCACGTGACACGCC-3'<br>5'-CCCACGACACCCGTAAGA-3'                        |
| P3 primer for ChIP             | 5'-GTACGTGCCCAATACTTGACG-3'<br>5'-GGCTTTGTTCCAGGTGCTT-3'                   |
| P4 primer for ChIP             | 5'-AGCCAGTGCTAGACAGCAACAA-3'<br>5'-AGCCAAACCATATCACCTCCTT-3'               |
| P5 primer for ChIP             | 5'-GCACCTGTGCAGGAAGAG-3'<br>5'-TGAGATTTGGATGGGGATAC-3'                     |
| P6 primer for ChIP             | 5'-CATCCAAATCTCAGCTTGAATT-3'<br>5'-CCTTGATAAACCTCCAGGTA-3'                 |
| <b><i>FISH probes</i></b>      |                                                                            |
| AFAP1-AS1                      | AAGGGGCTCAAAGATACACCAAAGT                                                  |

ATGTTGGATGTCTAATCAGGGAGCC  
 CACCCTCTTCCCTTCCCTGTAGTAG  
 CAGAGAAGCATTAAGACATGAGACACT  
 TGAGAAAAGAATCACCAAGAGAGTAAG

**Table S2. The potential binding sites of Sp1 towards lncRNA AFAP1-AS1 promoter regions (hg38\_knownGene\_ENST00000608442.2, range = chr4:7752077-7779028) by JASPAR with relative profile score threshold of 80 %.**

| <i>Matrix ID</i> | <i>Name</i>  | <i>Score</i> | <i>Relative score</i> | <i>Start</i> | <i>End</i> | <i>Strand</i> | <i>Predicted sequence</i> |
|------------------|--------------|--------------|-----------------------|--------------|------------|---------------|---------------------------|
| <b>MA0079.1</b>  | MA0079.1.SP1 | 9.304687     | 0.911425279           | 1175         | 1184       | +             | CGGGCGTGGT                |
| <b>MA0079.3</b>  | MA0079.3.SP1 | 9.048192     | 0.894977296           | 790          | 800        | +             | TTCTCTCCCCA               |
| <b>MA0079.1</b>  | MA0079.1.SP1 | 8.938865     | 0.89866482            | 1792         | 1801       | +             | GAGGCAGGGA                |
| <b>MA0079.5</b>  | MA0079.5.SP1 | 8.318838     | 0.863441621           | 1878         | 1886       | +             | TGGGAGGGA                 |
| <b>MA0079.1</b>  | MA0079.1.SP1 | 8.311052     | 0.876765707           | 1037         | 1046       | +             | TGGGCCGGGT                |
| <b>MA0079.3</b>  | MA0079.3.SP1 | 8.113572     | 0.883218707           | 766          | 776        | +             | GCCCATCCCCC               |
| <b>MA0079.5</b>  | MA0079.5.SP1 | 8.020701     | 0.858261002           | 1245         | 1253       | +             | GAGGCGGAG                 |
| <b>MA0079.1</b>  | MA0079.1.SP1 | 7.197659     | 0.837928744           | 1877         | 1886       | +             | GTGGGAGGGA                |
| <b>MA0079.1</b>  | MA0079.1.SP1 | 6.957125     | 0.829538534           | 1911         | 1920       | +             | GGGGGCTGGT                |
| <b>MA0079.1</b>  | MA0079.1.SP1 | 6.7868495    | 0.823599042           | 273          | 282        | +             | TGGGGATGGA                |
| <b>MA0079.5</b>  | MA0079.5.SP1 | 6.593582     | 0.833462442           | 1798         | 1806       | +             | GGGAAGGAG                 |
| <b>MA0079.3</b>  | MA0079.3.SP1 | 6.4261227    | 0.861988661           | 1509         | 1519       | +             | CGCCTGCCCCC               |
| <b>MA0079.1</b>  | MA0079.1.SP1 | 6.1590366    | 0.801699912           | 160          | 169        | +             | TGGGGAAGGT                |
| <b>MA0079.5</b>  | MA0079.5.SP1 | 5.623053     | 0.816597892           | 274          | 282        | +             | GGGGATGGA                 |
| <b>MA0079.4</b>  | MA0079.4.SP1 | 5.5256863    | 0.845683731           | 758          | 772        | +             | CGTGACACGCCCATC           |
| <b>MA0079.5</b>  | MA0079.5.SP1 | 5.255307     | 0.810207699           | 1037         | 1045       | +             | TGGGCCGGG                 |
| <b>MA0079.3</b>  | MA0079.3.SP1 | 5.1665006    | 0.846141173           | 100          | 110        | +             | TTCACTCCCCC               |
| <b>MA0079.3</b>  | MA0079.3.SP1 | 2.6205626    | 0.814110358           | 765          | 775        | +             | CGCCCATCCCC               |
| <b>MA0079.3</b>  | MA0079.3.SP1 | 2.4257746    | 0.811659703           | 1918         | 1928       | +             | GGTCTTCCCCG               |
| <b>MA0079.3</b>  | MA0079.3.SP1 | 2.1372697    | 0.808029981           | 770          | 780        | +             | ATCCCCCCCCAT              |
| <b>MA0079.4</b>  | MA0079.4.SP1 | 0.9273069    | 0.804953733           | 1690         | 1704       | +             | CAGAACACGCACCTG           |
| <b>MA0079.4</b>  | MA0079.4.SP1 | 0.9273069    | 0.804953733           | 1722         | 1736       | +             | CAGAACACGCACCTG           |
| <b>MA0079.4</b>  | MA0079.4.SP1 | 0.7430556    | 0.803321733           | 763          | 777        | +             | CACGCCCATCCCCC            |

**Table S3. The intersection of down-regulated genes in MDA-MB-231 and MDA-MB-468 cells after knockdown of lncRNA AFAP1-AS1, and the relative KEGG pathways of these 17 down-regulated genes which appeared more than twice.**

| <i>Overlapped down-regulated genes</i> | <i>Relative KEGG pathways</i>                                    |
|----------------------------------------|------------------------------------------------------------------|
| <i>ARSD</i>                            | hsa00500: Starch and sucrose metabolism                          |
| <i>UBE2I</i>                           | hsa04120: Ubiquitin mediated proteolysis                         |
| <i>KLF6</i>                            | hsa04960: Aldosterone-regulated sodium reabsorption              |
| <i>COMT</i>                            | hsa04121: Ubiquitin system BR                                    |
| <i>DUSP1</i>                           | hsa03019: Messenger RNA biogenesis BR                            |
| <i>NANOS1</i>                          | <b>hsa04150: mTOR signaling pathway</b>                          |
| <i>GYG2</i>                            | hsa04151: PI3K-Akt signaling pathway                             |
| <i>C6orf120</i>                        | hsa04990: Domain-containing proteins not elsewhere classified BR |
| <i>NEDD4L</i>                          | hsa03000: Transcription factors BR                               |
| <i>ENPP1</i>                           |                                                                  |
| <i>SGK1</i>                            |                                                                  |
| <i>FAM172A</i>                         |                                                                  |
| <i>MATN2</i>                           |                                                                  |
| <i>EIF4B</i>                           |                                                                  |
| <i>LMO4</i>                            |                                                                  |
| <i>FOSB</i>                            |                                                                  |
| <i>CPA4</i>                            |                                                                  |

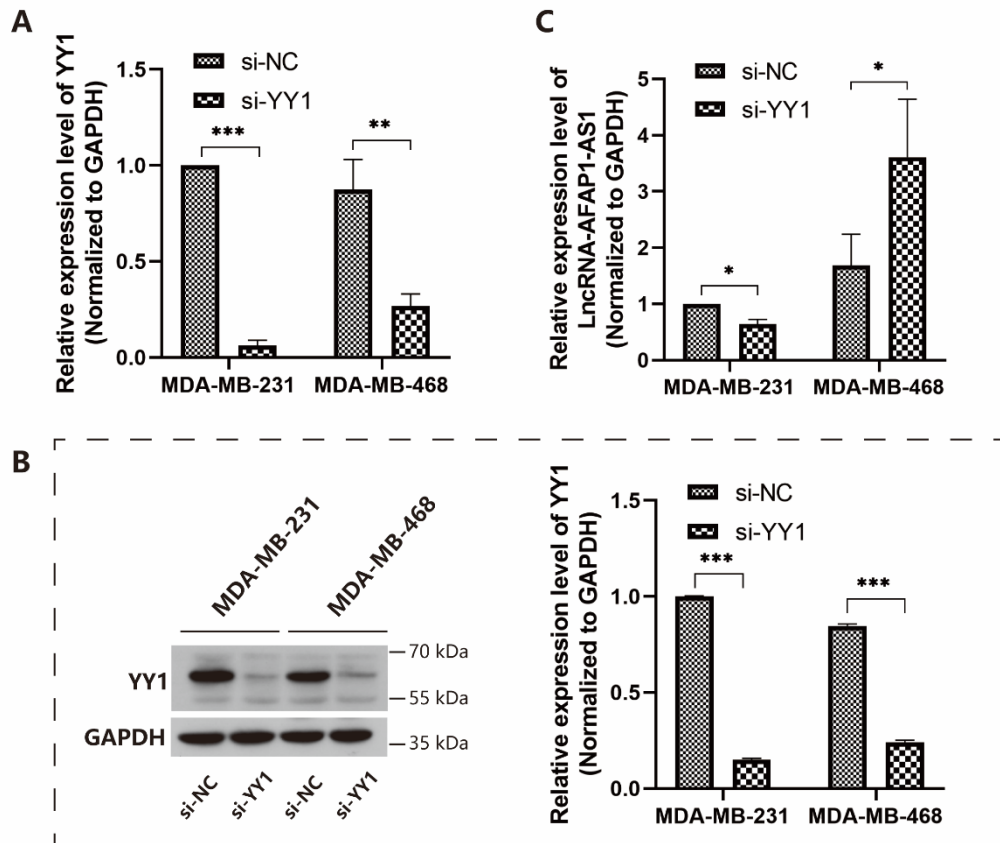

**Figure S1 The regulation of YY1 towards the expression of lncRNA AFAP1-AS1.** (A) Q-RT-PCR and (B) western blot assays confirmed the silencing efficiency of YY1 by siRNA; (C) lncRNA AFAP1-AS1 expression was decreased in MDA-MB-231 cell after YY1 silencing and increased in MDA-MB-468 cell. Unpaired student's t-tests were used for the statistical analyses. \* $p < 0.05$ ; \*\* $p < 0.01$ ; \*\*\* $p < 0.005$ ; ns, no significant.
